# Supplementary material for: Computational analysis of nascent peptides that induce ribosome stalling and their proteomic distribution in Saccharomyces cerevisiae
Source: PubMed Central journal article supplement — RNA. 2017 Jul;23(7):983–94. doi: 10.1261/rna.059188.116 (PMC5473148; doi:10.1261/rna.059188.116), 2017-07
Supplement: supp_059188.116_Supplemental_Fig_S1.pdf [file supp_059188.116_Supplemental_Fig_S1.pdf]

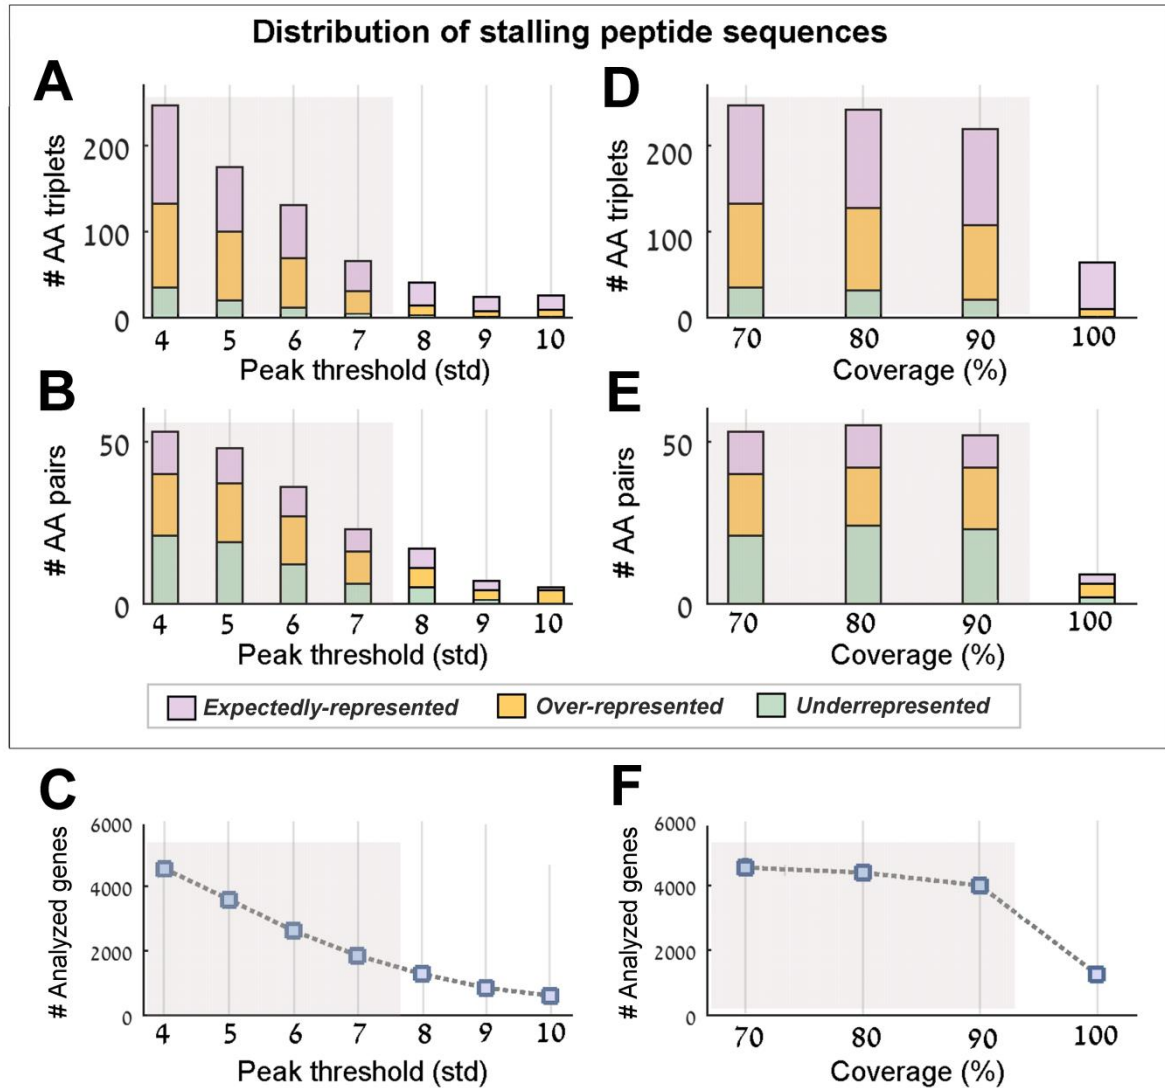

**Robustness of the results to changes in the chosen parameters.** The shaded area in all sub-figures represents a robust area in which the findings presented in Fig. 2 remain significant. **(A-C)** Robustness to changes in the peak threshold (4 is the default value used in the main text). **(E-F)** Robustness to changes in the minimum coverage of the ribo/mRNA read count profile required to include a gene in the analysis (70 percent is the default value used in the main text).
