# Supplementary material for: Computational analysis of nascent peptides that induce ribosome stalling and their proteomic distribution in Saccharomyces cerevisiae
Source: PubMed Central journal article supplement — RNA. 2017 Jul;23(7):983–94. doi: 10.1261/rna.059188.116 (PMC5473148; doi:10.1261/rna.059188.116), 2017-07
Supplement: supp_059188.116_Supplemental_Fig_S3.pdf [file supp_059188.116_Supplemental_Fig_S3.pdf]

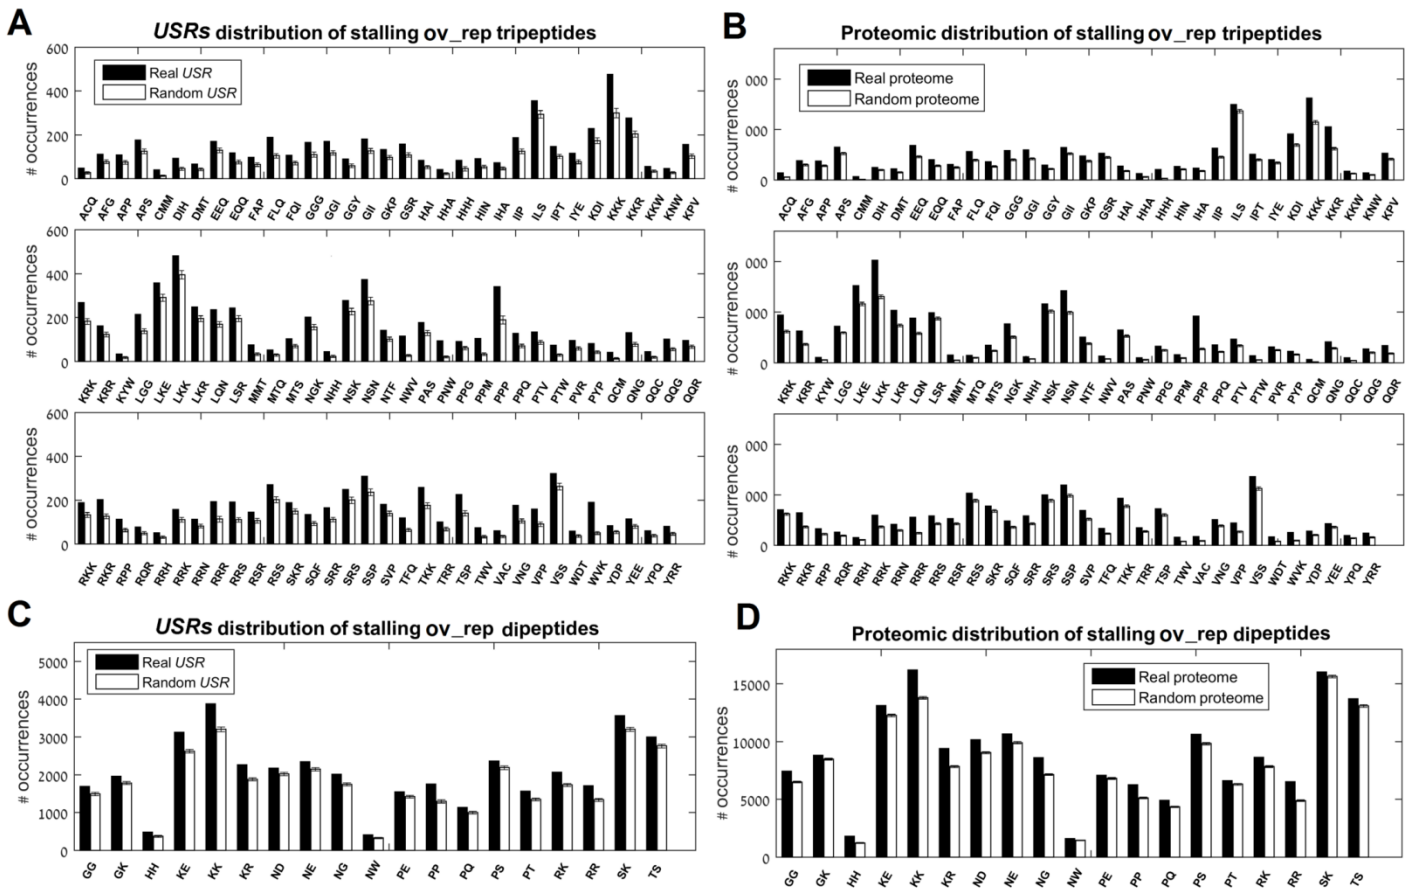

**Distribution of the over-represented stalling motifs in *USRs* and in the proteome. (A,C)**

The number of occurrences of each motif in the real *USR* (black) versus the mean and standard deviation of the number of occurrences in the randomized versions (white). (B,D)

The number of occurrences of each motif in the real proteome (black) versus the mean and standard deviation of the number of occurrences in the randomized versions (white).
