# Supplementary material for: Computational analysis of nascent peptides that induce ribosome stalling and their proteomic distribution in Saccharomyces cerevisiae
Source: PubMed Central journal article supplement — RNA. 2017 Jul;23(7):983–94. doi: 10.1261/rna.059188.116 (PMC5473148; doi:10.1261/rna.059188.116), 2017-07
Supplement: supp_059188.116_Supplemental_Fig_S4.pdf [file supp_059188.116_Supplemental_Fig_S4.pdf]

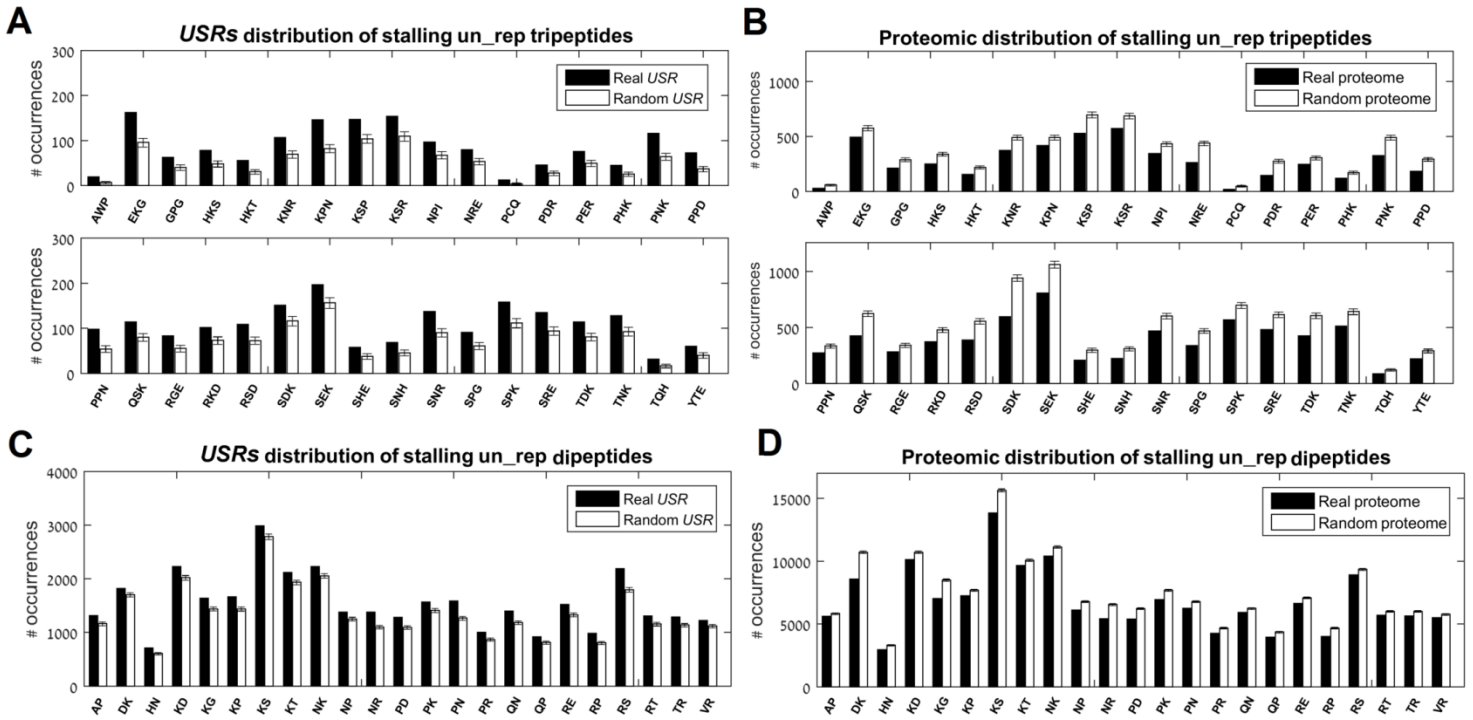

**Distribution of the underrepresented stalling motifs in *USRs* and in the proteome.**

**(A,C)** The number of occurrences of each motif in the real *USR* (black) versus the mean and standard deviation of the number of occurrences in the randomized versions (white). **(B,D)** The number of occurrences of each motif in the real proteome (black) versus the mean and standard deviation of the number of occurrences in the randomized versions (white).
