# Supplementary material for: Computational analysis of nascent peptides that induce ribosome stalling and their proteomic distribution in Saccharomyces cerevisiae
Source: PubMed Central journal article supplement — RNA. 2017 Jul;23(7):983–94. doi: 10.1261/rna.059188.116 (PMC5473148; doi:10.1261/rna.059188.116), 2017-07
Supplement: supp_059188.116_Supplemental_Fig_S5.pdf [file supp_059188.116_Supplemental_Fig_S5.pdf]

### A. Stalling dipeptide sequences

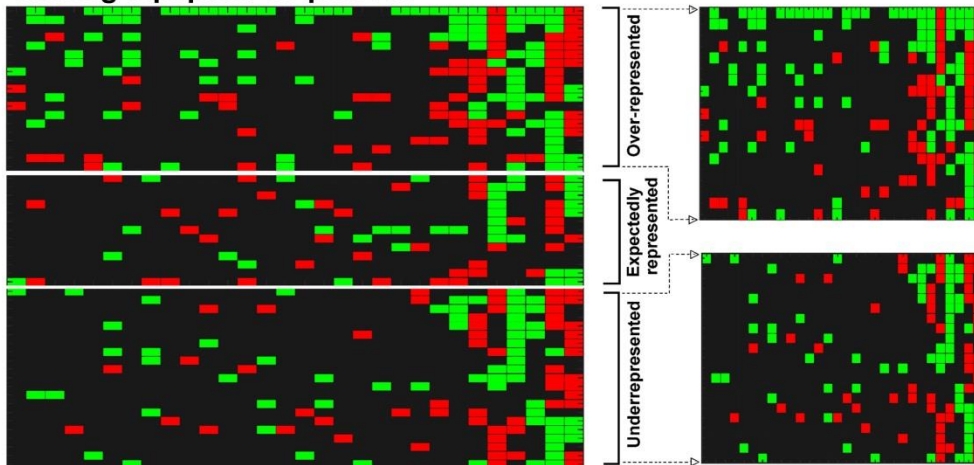

### B. Stalling tripeptide sequences

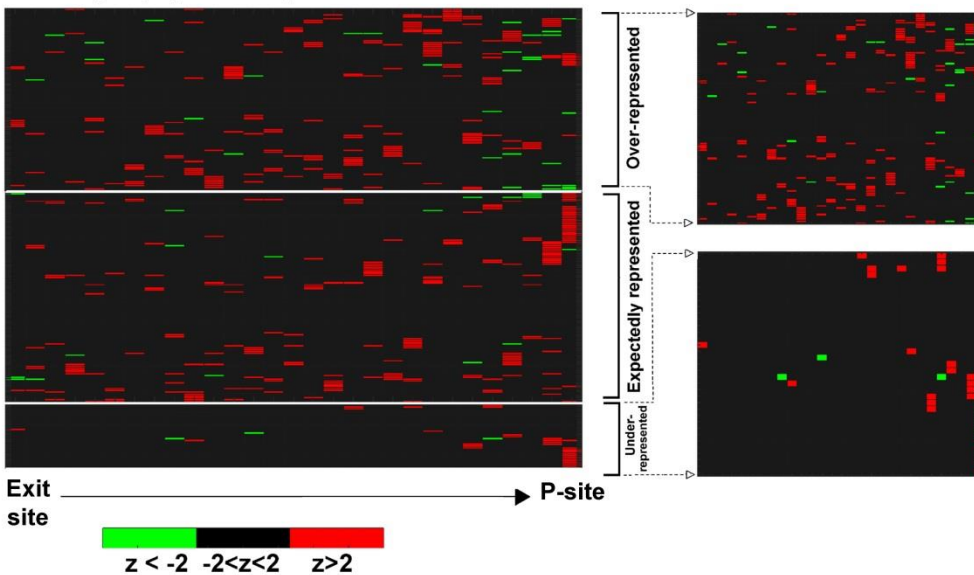

The positions of the stalling peptide sequences along the exit tunnel. Each row represents a specific peptide sequence and each column represents a positions along the tunnel. Thus, each cell represents the tendency of a peptide sequence to occupy specific position along the tunnel. The number of times each peptide sequence was observed at a specific position was calculated based on all *USR*s and was also compared to the average number of times it appeared at the same position in random *USR*s. The difference between the real and random *USR*s was quantified by a standardized score (z-score). Red cells represent significant tendency to appear in these positions and green cells represent significant elimination from these

positions. Insignificant cells are shown in black. **(A)** Stalling dipeptide sequences **(B)** stalling tripeptide sequences.
